# Supplementary material
Source: PubMed Central journal article supplement (PMC2772546)
Supplement: supp_77_11_5035__1.pdf [file supp_77_11_5035__1.pdf]

## mouse

CRP1 LRDLVCYCRSRGCKGRERMNGTCKGHLLYTLCCR  
CRP2 LRDLVCYCRTRGCKRRERMNGTCKGHLMYTLCCR  
CRP3 LRDLVCYCRKRGCKRRERMNGTCKGHLMYTLCCR  
CRP4 GLLCYCRKGHCCKGERVVGTC-G--IRFLYCCPRR  
CRP5 LSKKLIICYCRIRGCKRRERMVFGTCNLFLLTFVFCSS  
CRP6 LRDLVCYCRARGCKGRERMNGTCKGHLLYMLCCR  
B6a LHEKSSRDLIYCRKGGCNRGEQVYGTC-S--GRLLFCCRRRH  
B6b LSRDLICLCRNRRCNRGELFYGTC-A--GPFLRCCRRR

## human

HNP-1 ACYCRIPACIAGERRYGTCTIYQGRLWAFCC  
HNP-2 CYCRIPACIAGERRYGTCTIYQGRLWAFCC  
HNP-3 DCYCRIPACIAGERRYGTCTIYQGRLWAFCC  
HNP-4 VCSCRLVFCRRTELRVGNCLIGVVSFTYCTTRVD  
HD-5 ATCYCRTGRCATRESLSGVCEISGRLYRLCCR  
HD-6 AFTCHCRRS-CYSTEYSYGTCTVMGINHRFCL

## rat

RD-5 LRDLKCFCKRRKSCNWEGIMGICKKRYGSPILCCR  
NP-1 VTCYCRRTRCGFRERLSGACGYRGRIYRLCCR  
NP-2 VTCYCRSTRCGFRERLSGACGYRGRIYRLCCR  
NP-3 CSCRTSSCFRGERLSGACRLNGRIYRLCC  
NP-4 ACYCRIGACVSGERLTGACGLNGRIYRLCCR

## rabbit

NP-1 VVCACRRALCLPERRRAGFCRIRGRIHPLCCR  
NP-2 VVCACRRALCLPLERRRAGFCRIRGRIHPLCCR  
NP-3A GICACRRRFPNSERFSGYCRVNGARYVRCSSR  
NP-3B GRCVCRRTSSCFRGERLSGACRLNGRIYRLCC  
NP-4 VSCTCRRFSCGFRERASGSCTVNGVRHTLCCR  
NP-5 VFCTCRGFLCGSGERASGSCTINGVRHTLCCR

## monkey

RMAD-1 ACYCRIPACLAGEERRYGTCTFYLRVWAFCC  
RMAD-2 ACYCRIPACLAGEERRYGTCTFYMRVWAFCC  
RMAD-3 ACYCRIPACLAGEERRYGTCTFYRRRVWAFCC  
RMAD-4 RRTCRCRFRGRCFRRESYSGSCNINGRIFSLCCR  
RMAD-5 RRTCRCRFRGRCFRRESYSGSCNINGRIFSLCCR  
RMAD-6 RRTCRCRFRGRCFRRESYSGSCNINGRISSLCCR  
RMAD-7 RRTCRCRFRGRCFRRESYSGSCNINGRISSLCCR  
RMAD-8 ACYCRIPACLAGEERRYGTCTFYLRVWAFCC  
RED-1 RRTCRCRIRRCRGLLESSFGNCILHGQFAKLCR  
RED-2 FTCHCRIGRCSWFETRFRSCTLLGLAANLCCR  
RED-3 HTCYCRNRCFTPEFHAGCKVEGRITYKLCR  
RED-4 RTCYCRTGRCYTPEFHSGKCVFNGRITYKLCR  
RED-5 MICLCRIGRCSWREAHFGSCTKMGQFAKICRRAS  
RED-6 RNCHCRIGHCRPAPPMGVCIHGQFGKLCR

## hamster

HANP-4 VTCFCRKPVCDSGETQIGYCRLGNTFYRLCCRQ  
HANP-3 VTCFCRRRGCASRERLIGYCRFGNTIYGLCCR  
HANP-2 CFCKRPVCDSGETQIGYCRLGNTFYRLCCRQ  
HANP-1 VTCFCRRRGCASRERHIGYCRFGNTIYRLCCR

## guinea pig

GNP-1 RRCICTTRTCRFPYRRLGTCIFQNRVYTFCC

Supplementary Figure S1. An alignment of representative known mammalian  $\alpha$ -defensins illustrates an Arg:Lys ratio of 9:1. Arg residue positions are highlighted in black and Lys positions in blue.

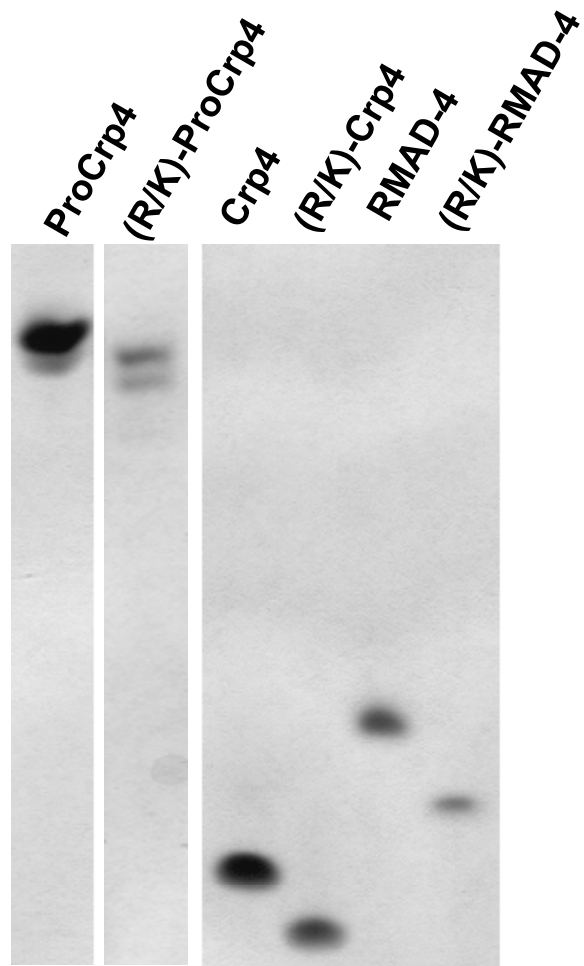

Supplementary Figure S2. Twelve micrograms proCrp4 and (R/K)-proCrp4 and 6  $\mu$ g samples of Crp4, (R/K)-Crp4, RMAD-4, and (R/K)-RMAD-4 were resolved by acid-urea-PAGE and stained with Coomassie Blue.

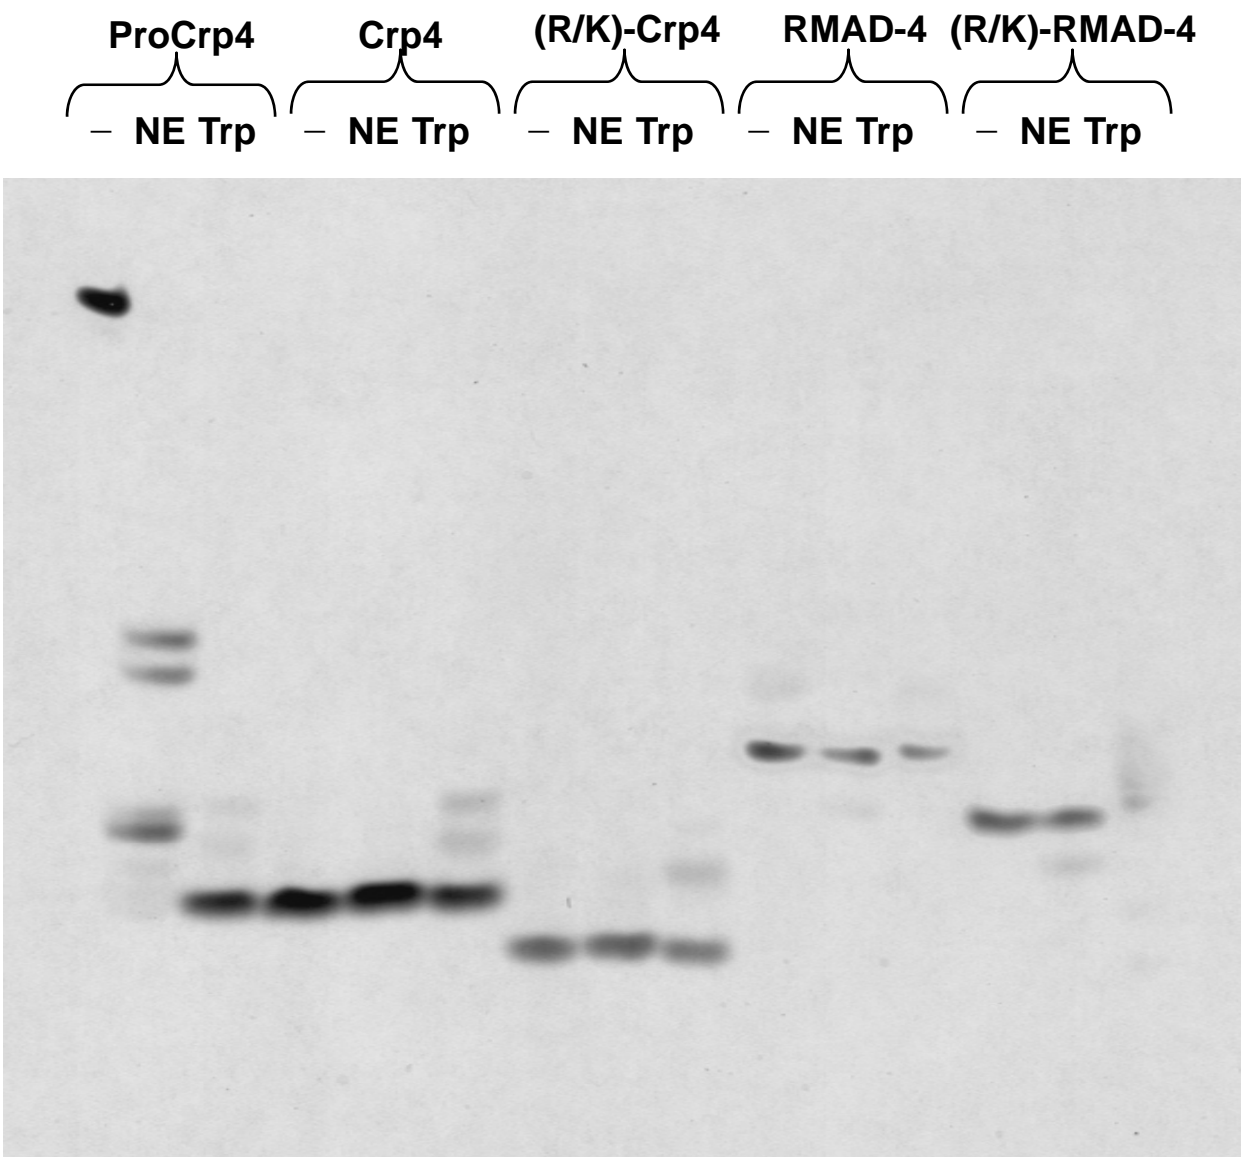

**Supplementary Figure S3.** Sensitivity of Lys-substituted  $\alpha$ -defensins to neutrophil elastase (NE) and trypsin (Trp) proteolysis. Twelve micrograms of proCrp4 and 6  $\mu$ g of Crp4, (R/K)-Crp4, RMAD-4 and (R/K)-RMAD-4 were incubated in 50 mM ammonium bicarbonate alone (-), with NE in 50 mM Tris, 150 mM NaCl (pH 7.5) at 37  $^{\circ}$ C for 2 h at a substrate:enzyme ratio of 40:1 NE, or with Trp in 50 mM ammonium bicarbonate at a 50:1 substrate:enzyme ratio for 2 h (see "Materials and Methods").

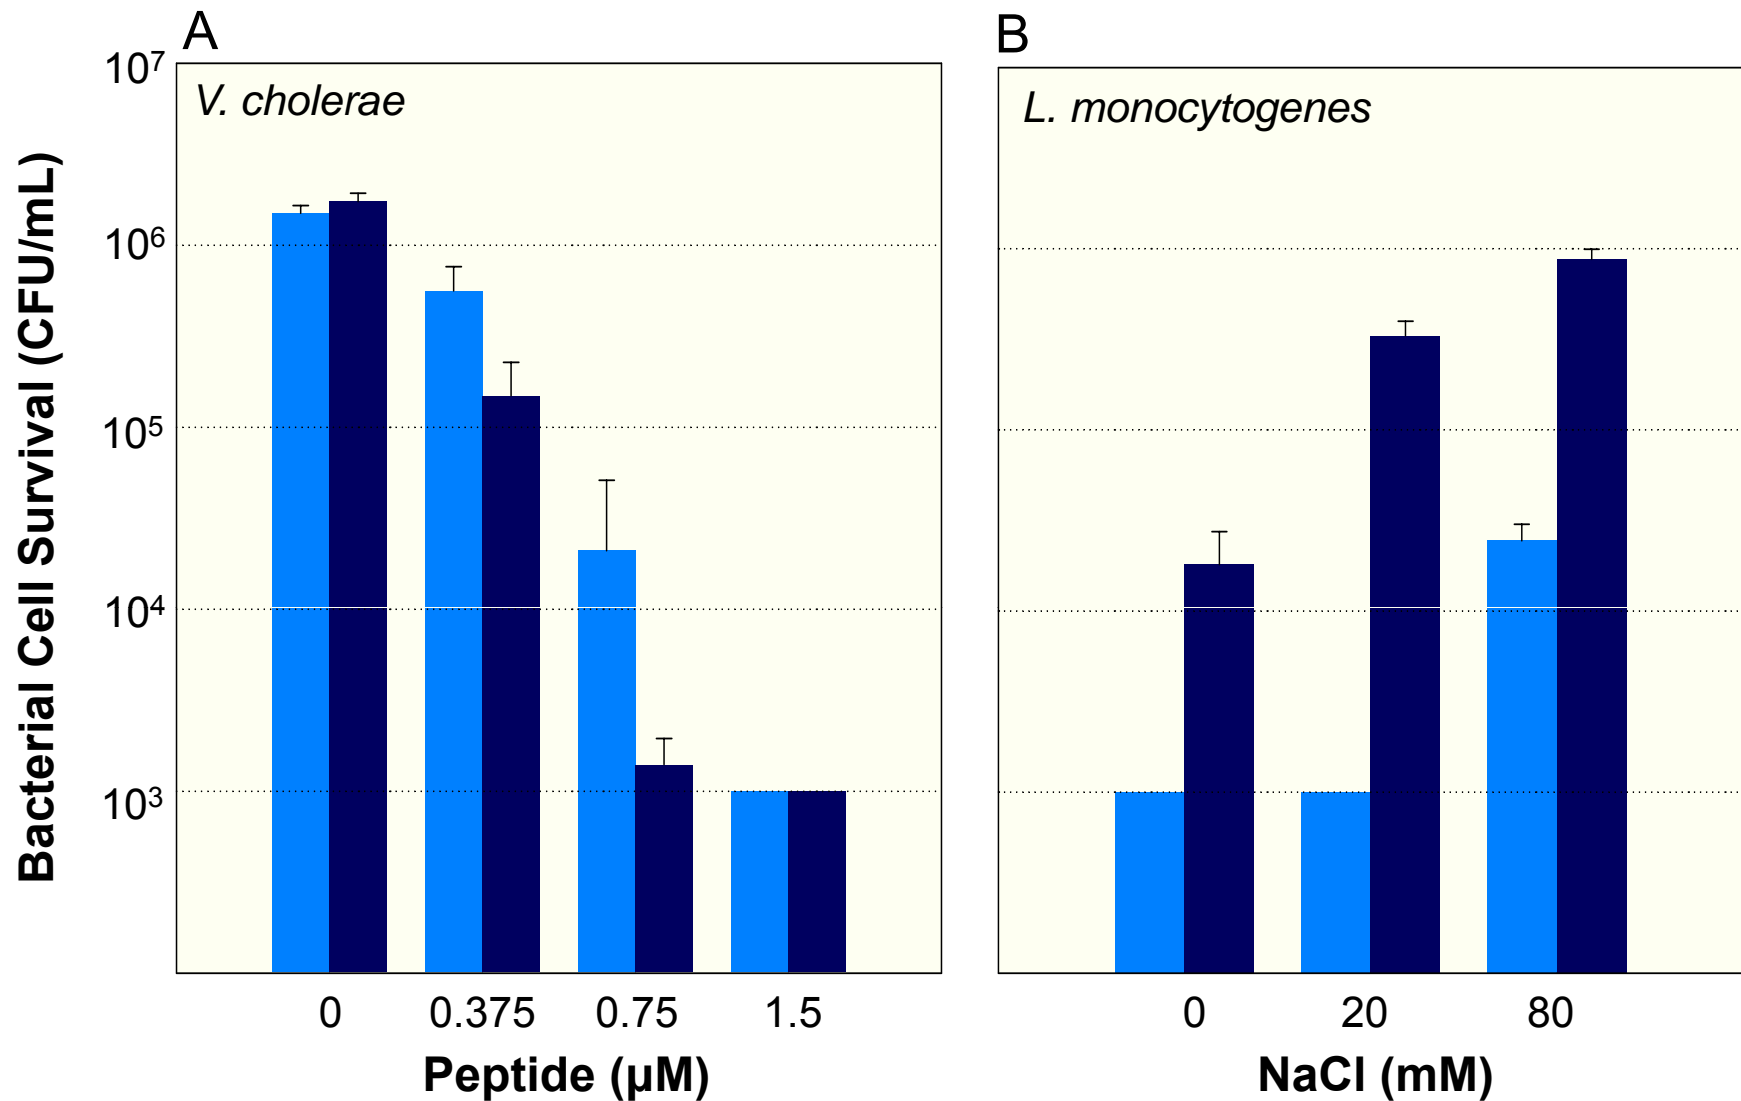

**Supplementary Figure S4.** In panel A, five replicate bactericidal peptide assays were performed using RMAD-4 (light blue) and (R/K)-RMAD-4 (dark blue) at 1.5  $\mu\text{M}$ , 0.75  $\mu\text{M}$ , 0.375  $\mu\text{M}$  and 0  $\mu\text{M}$  against *V. cholerae*. Log-phase bacteria were exposed to peptide for 1 h in PIPES-TSB buffer (see “Materials and Methods”). Following peptide exposure, the bacteria were plated on TSB-agar plates and surviving bacteria were counted as CFU/ml after growth overnight at 37 °C. (B) Five replicate bactericidal peptide assays of RMAD-4 (light blue) and (R/K)-RMAD4 (dark blue) activity at 1.5  $\mu\text{M}$  concentration against *L. monocytogenes*. Log-phase bacteria were exposed to peptides for 1 h in PIPES-TSB buffer, or in PIPES-TSB supplemented with 20 mM or 80 mM NaCl for 1 h. Following peptide exposure, the bacterial cell survival was determined as in panel A (see “Material and Methods”). Error bars denote standard deviation from the mean.
